# Supplementary material for: Structural insights into synthetic ligands targeting A–A pairs in disease-related CAG RNA repeats
Source: PubMed Central journal article supplement (PMC6847237; doi:10.1093/nar/gkz832), 2019-09-30
Supplement: gkz832_supplemental_file.pdf [file gkz832_supplemental_file.pdf]

## SUPPLEMENTARY DATA

### **Structural insights into synthetic ligands targeting A-A pairs in disease-related CAG RNA repeats**

Sanjukta Mukherjee<sup>1†</sup>, Leszek Błaszczuk<sup>2†</sup>, Wojciech Rypniewski<sup>2</sup>, Christoph Falschlunger<sup>3</sup>,  
Ronald Micura<sup>3</sup>, Asako Murata<sup>1</sup>, Chikara Dohno<sup>1</sup>, Kazuhiko Nakatani<sup>1\*</sup>, Agnieszka Kiliszek<sup>2\*</sup>

<sup>1</sup>Department of Regulatory Bioorganic Chemistry, The Institute of Scientific and Industrial Research, Osaka University 8-1 Mihogaoka, Ibaraki 567-0047, Japan

<sup>2</sup>Institute of Bioorganic Chemistry, Polish Academy of Sciences, Noskowskiego 12/14, 61-704 Poznan, Poland

<sup>3</sup>Institute of Organic Chemistry and Center for Molecular Biosciences Innsbruck CMBI, Leopold-Franzens University, Innrain 80-82, Innsbruck 6020, Austria

† These authors contributed equally to this work

\* Correspondence should be addressed to A.K. (kiliszek@ibch.poznan.pl) or K.N. (nakatani@sanken.osaka-u.ac.jp).

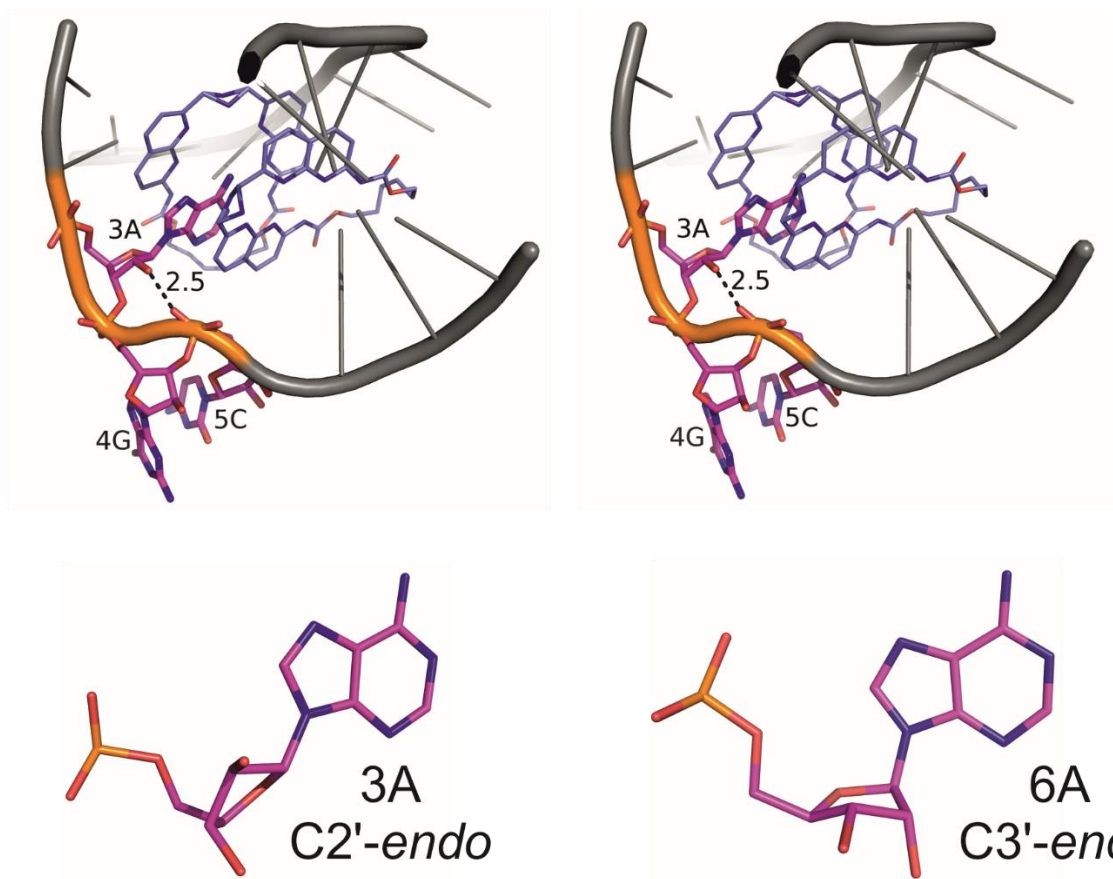

**Figure S1.** The rearrangement of the RNA chain (orange) as a result of flipping out of the 4G and 5C residues and C2'-*endo* conformation of the 3A ribose (stereo view). The hydrogen bond between 2'OH group of 3A and oxygen atom of 5C is marked as dashed line.

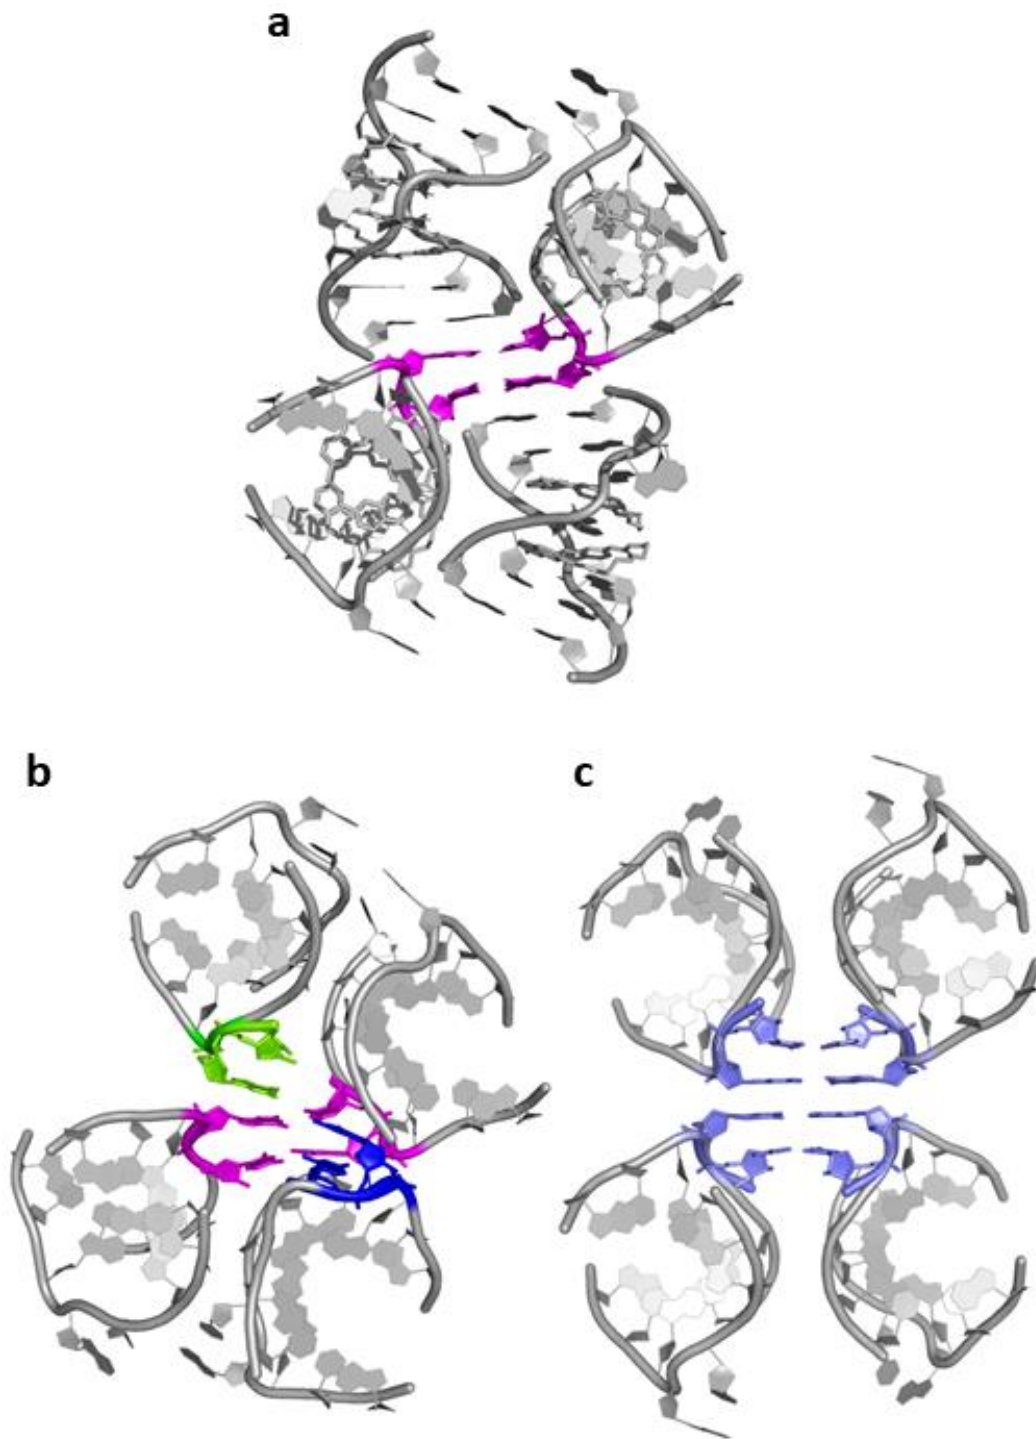

**Figure S2.** Higher order interactions in the crystal lattice of RNA-CMBL complexes. **a**, Extruded 4G and 5C residues (*purple*) are integrated into the pseudo-infinite helix in the crystal lattice of the CAG-CMBL4 structure. **b**, A complex interaction involving four RNA duplexes, including Watson-Crick pairing (*purple*) triplex (*navy*) and stacking (*green*), in the CAG(Se)-CMBL3a model. **c**, An i-motif like (*blue*) in the CAG-CMBL3a(I) structure.

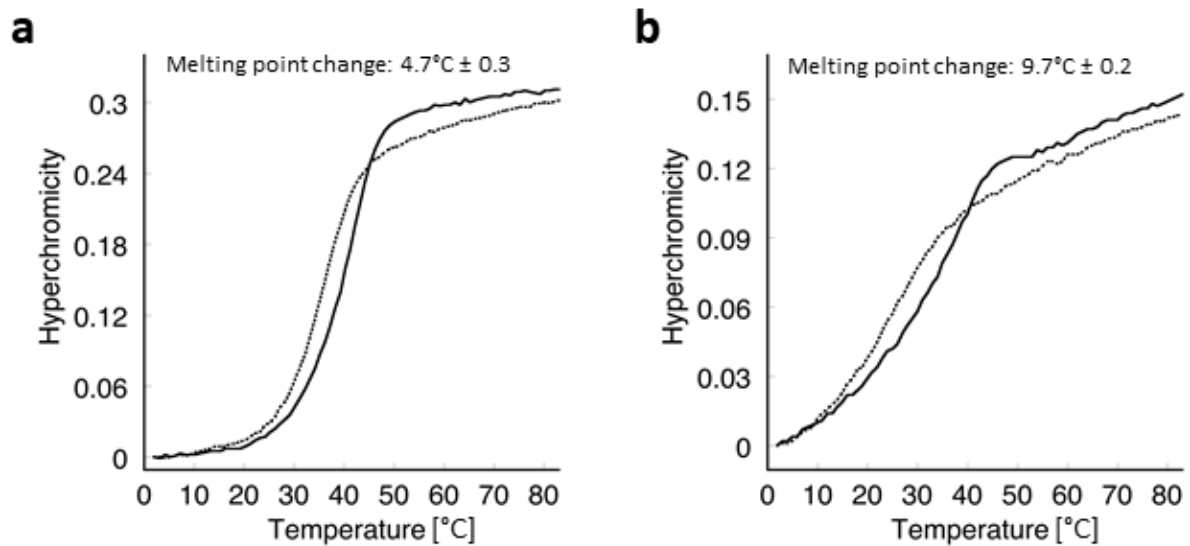

**Figure S3.** Thermal denaturation profiles of the CAG-containing RNA. **a**,  $(UCAACAGUUGA)_2$  and **b**,  $(GCAGCAGC)_2$ . Dashed and bold lines represent the melting curve without and with CMBL3a, respectively.

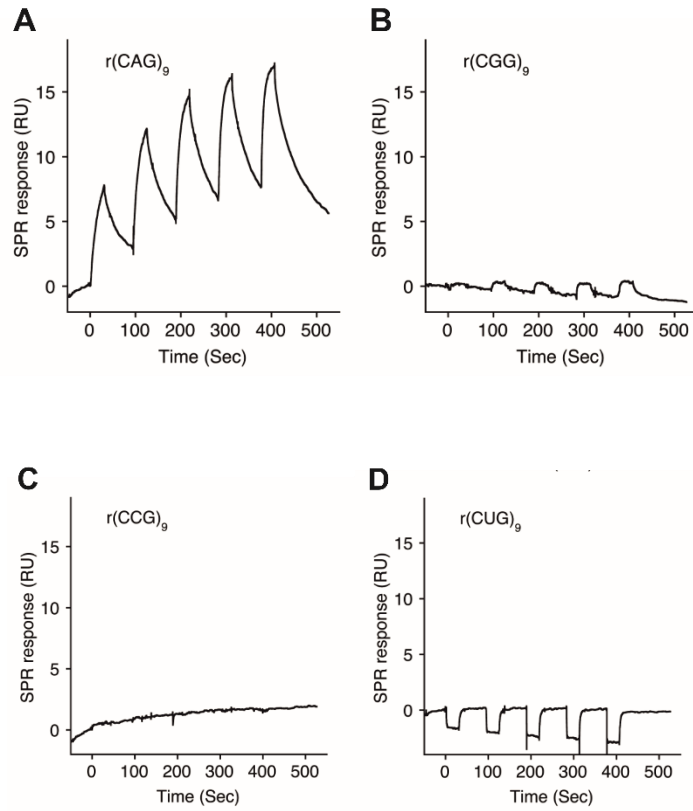

**Figure S4.** Biochemical analysis of CMBL3a interacting with CNG RNA repeats using Surface Plasmon Resonance. (A-D) SPR response as CMBL3a is added at increasing concentrations to immobilized RNA.

CMBL3a

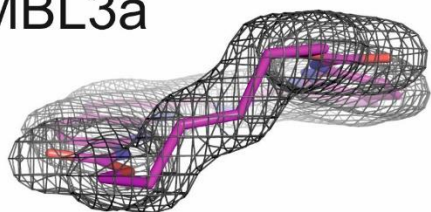

CMBL3b

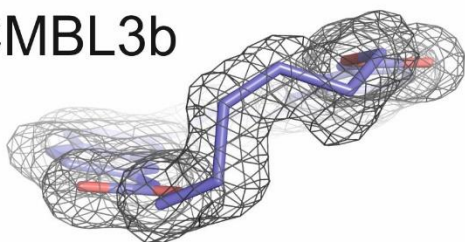

CMBL4

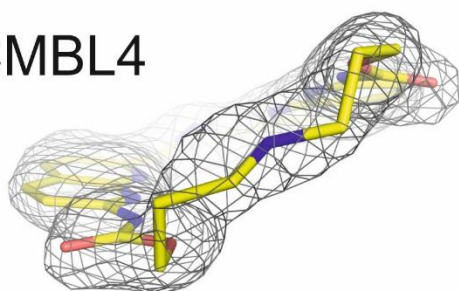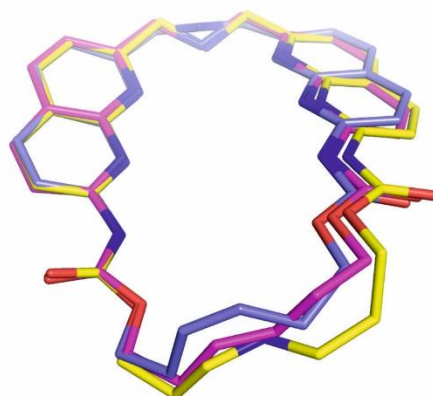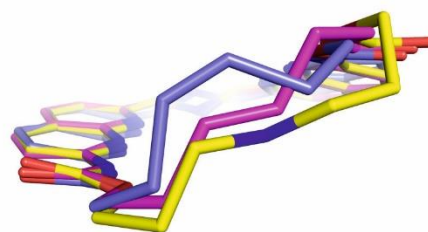

**Figure S5.** Conformation of the longer linker in the CMBL ligands. **Left panel,** The  $2F_o - F_c$  electron density map of the CMBL ligands countered at  $1\sigma$  (grey). **Right panel,** Superposition of the structures of CMBL ligands showing differences in the conformation of the longer linker.
